# Supplementary material for: Macrocycles incorporating isomeric arms: synthesis and crystal structures of ligands and their mono-, di- and polynuclear supramolecular complexes
Source: Royal Society of Chemistry journal article supplement (doi:10.1039/c2ce25708d), 2012-01-01
Supplement: c2ce25708d.pdf [file c2ce25708d.pdf]

## Electronic Supplementary Information

for

### **Macrocycles incorporating isomeric arms: synthesis and crystal structures of ligands and their mono-, di- and polynuclear supramolecular complexes**

**Sunhong Park,<sup>†</sup> Seul-Gi Lee,<sup>†</sup> Jong Hwa Jung,<sup>†</sup> Mari Ikeda,<sup>‡</sup> Yoichi Habata<sup>\*:‡</sup> and Shim Sung Lee<sup>\*:†</sup>**

<sup>†</sup>Department of Chemistry and Research Institute of Natural Science, Gyeongsang National University, Jinju 660-701, S. Korea

<sup>‡</sup>Department of Chemistry, Toho University, 2-2-1 Miyama, Funabashi, Chiba 274-8510, Japan

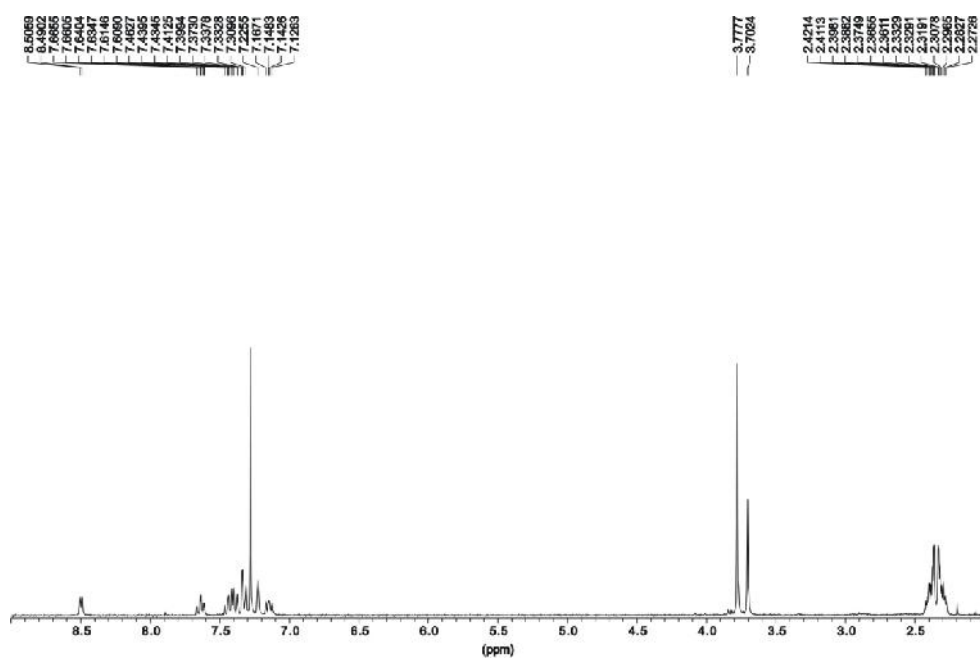

(a)

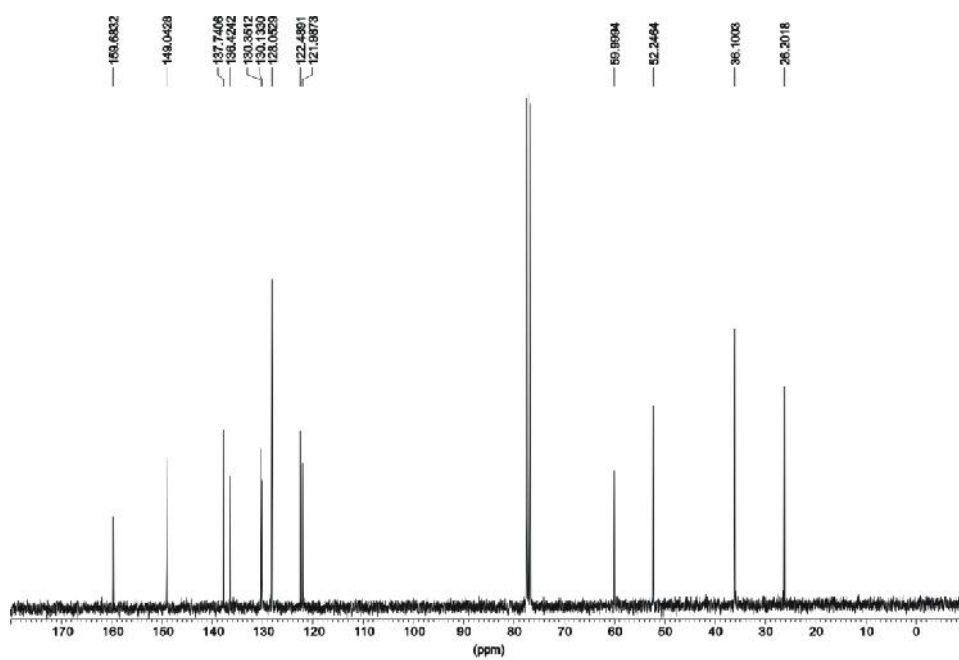

(b)

**Fig. S1** (a)  $^1\text{H}$  and (b)  $^{13}\text{C}$  NMR spectra of *o*-L in  $\text{CDCl}_3$ .

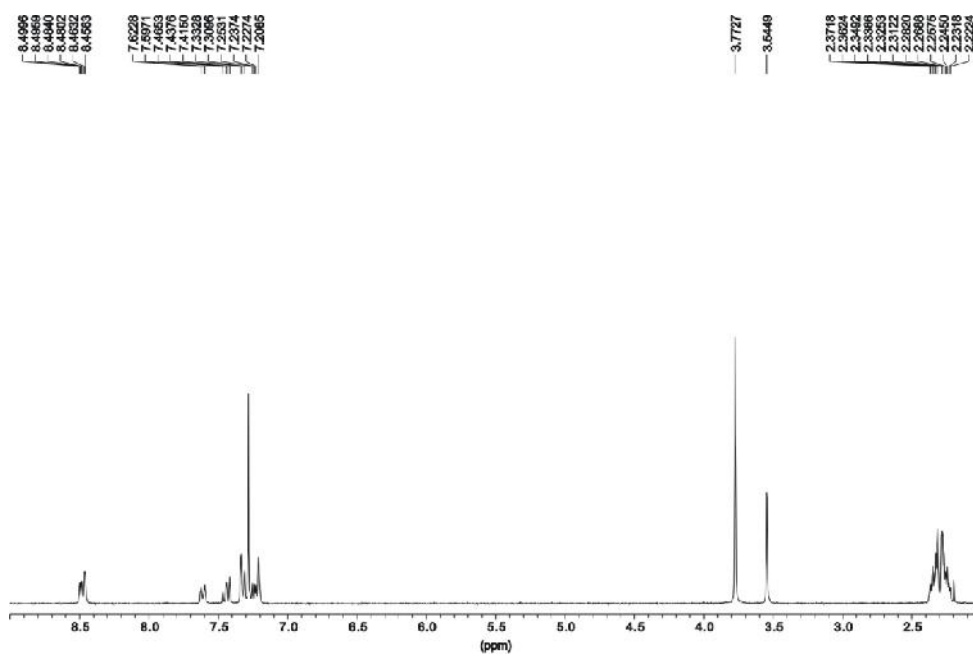

(a)

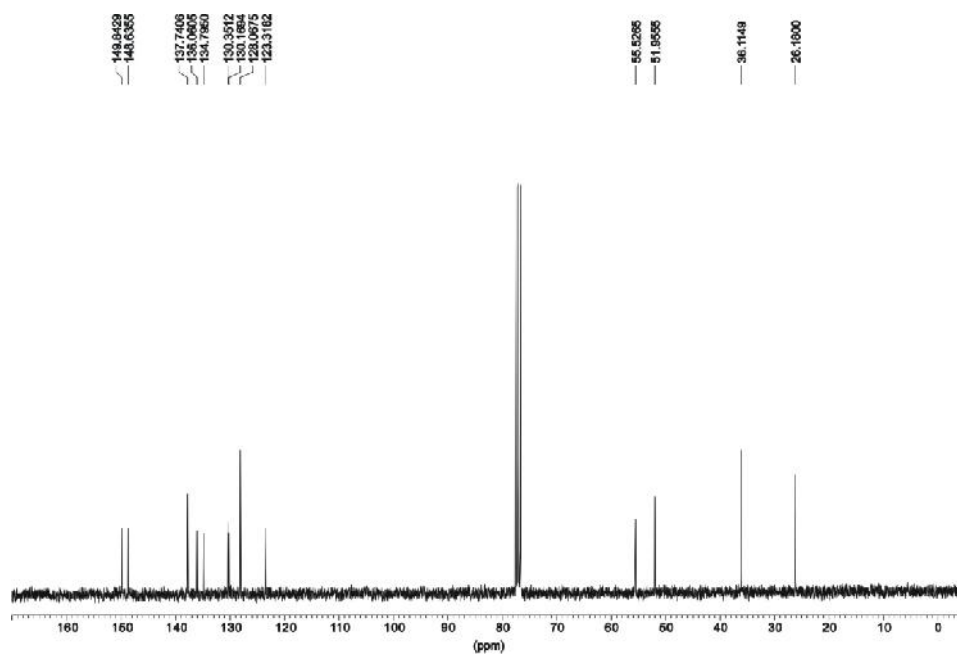

(b)

Fig. S2 (a)  $^1\text{H}$  and (b)  $^{13}\text{C}$  NMR spectra of *m-L* in  $\text{CDCl}_3$ .

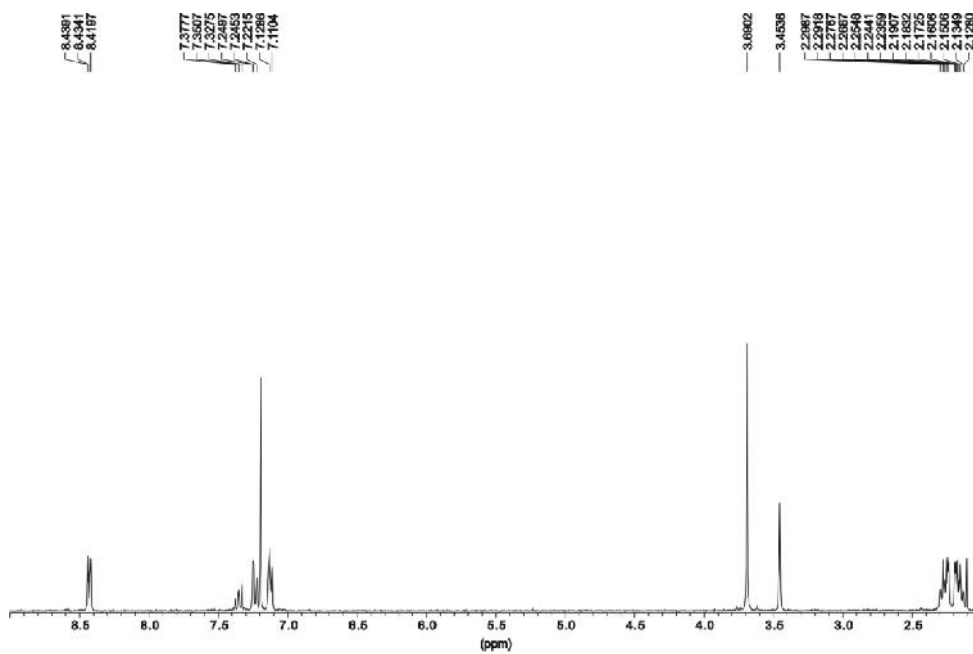

(a)

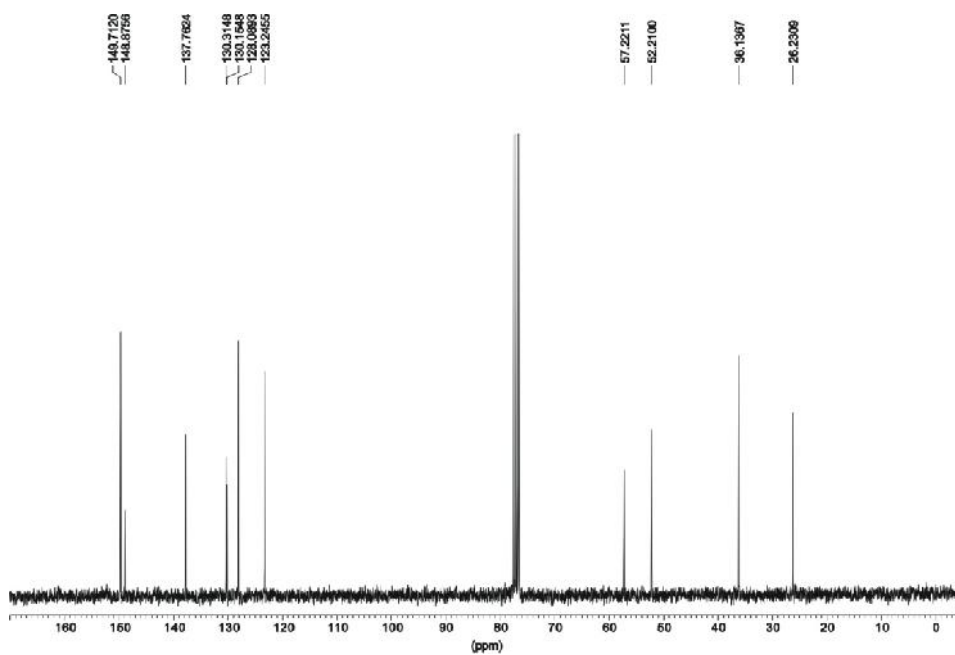

(b)

Fig. S3 (a)  $^1\text{H}$  and (b)  $^{13}\text{C}$  NMR spectra of *p-L* in  $\text{CDCl}_3$ .
